# Supplementary material
Source: PubMed Central journal article supplement (PMC6741548)
Supplement: jin-0006-0831-s01.pdf [file jin-0006-0831-s01.pdf]

| Figure 1b:       |                             | -ATP |      | +ATP |      |
|------------------|-----------------------------|------|------|------|------|
|                  |                             | 381  | DPG3 | 381  | DPG3 |
| Pro-IL-1 $\beta$ | Fold increase $\beta$ Actin | 1    | 1.17 | 0.52 | 0.29 |
| Supernatant      | Arbitrary Units             | -    | -    | 1    | 1.89 |

  

| Figure 1d:       |                             | -ATP |      | +ATP |      |      |      |
|------------------|-----------------------------|------|------|------|------|------|------|
|                  |                             | 381  | DPG3 | +KCl |      |      |      |
|                  |                             | 381  | DPG3 | 381  | DPG3 | 381  | DPG3 |
| Pro-IL-1 $\beta$ | Fold increase $\beta$ Actin | 1    | 1.06 | 0.18 | 0.10 | 1.06 | 1.08 |
| Supernatant      | Arbitrary Units             | -    | -    | 1    | 1.39 | 0.15 | 0.68 |

  

| Figure 1f:       |                             | -ATP |      | +ATP |      |      |      |
|------------------|-----------------------------|------|------|------|------|------|------|
|                  |                             | 381  | DPG3 | +BEL |      |      |      |
|                  |                             | 381  | DPG3 | 381  | DPG3 | 381  | DPG3 |
| Pro-IL-1 $\beta$ | Fold increase $\beta$ Actin | 1    | 1.04 | 0.62 | 0.52 | 0.69 | 0.52 |
| Supernatant      | Arbitrary Units             | -    | -    | 1    | 1.41 | -    | -    |

  

| Figure 4b:       |                             | -ATP |      | +ATP     |      |      |          |
|------------------|-----------------------------|------|------|----------|------|------|----------|
|                  |                             | 381  | DPG3 | +KCl     |      |      |          |
|                  |                             | 381  | DPG3 | DPG3-Fim | 381  | DPG3 | DPG3-Fim |
| Pro-IL-1 $\beta$ | Fold increase $\beta$ Actin | 1    | 1.90 | 2.23     | 0.93 | 0.49 | 1.84     |
| Supernatant      | Arbitrary Units             | -    | -    | -        | 1    | 1.84 | 1.15     |

  

| Figure 4c:       |                             | -ATP |      | +ATP     |      |      |          |
|------------------|-----------------------------|------|------|----------|------|------|----------|
|                  |                             | 381  | DPG3 | +KCl     |      |      |          |
|                  |                             | 381  | DPG3 | DPG3-Fim | 381  | DPG3 | DPG3-Fim |
| Pro-IL-1 $\beta$ | Fold increase $\beta$ Actin | 1    | 1.18 | 1.76     | 1.04 | 1.03 | 1.49     |
| Supernatant      | Arbitrary Units             | -    | -    | -        | -    | -    | -        |

  

| Figure 4d:    |                             | -ATP   |      |      | +ATP   |       |       |
|---------------|-----------------------------|--------|------|------|--------|-------|-------|
|               |                             | Medium | 381  | DPG3 | Medium | 381   | DPG3  |
| Pro-Caspase-1 | Fold increase $\beta$ Actin | 1      | 0.91 | 0.68 | 1.17   | 0.61  | 0.44  |
| Caspase-1     | Fold increase $\beta$ Actin | -      | 1    | 1.98 | -      | 22.34 | 36.40 |

Supplementary Figure 1

**Supplementary Fig. 1.** Quantification of all indicated western blots from figure 1 and 4 using Image J software. Normalization was performed using  $\beta$ -actin as a loading control and normalization was done according to non-stimulated cells or 381-stimulated cells without eATP as indicated in each situation.
